# Supplementary material for: Design, Synthesis and Bioactivity Evaluation of Novel β-carboline 1,3,4-oxadiazole Derivatives
Source: MDPI journal article supplement (doi:10.3390/molecules22111811), 2017-10-29
Supplement: s1 [file s1]

## Supplementary data

### Design, synthesis, bioactivity evaluation and QSAR studies of novel $\beta$ -carboline 1,3,4-oxadiazole derivatives

Zhi-Jun Zhang, Jing-Jing Zhang, Zhi-Yan Jiang, Guo-Hua Zhong\*

*Key Laboratory of Natural Pesticide and Chemical Biology, Ministry of Education, P.R. China,*

*Lab of Insect Toxicology, South China Agricultural University, Guangzhou, 510642, P.R. China.*

\*Author to whom correspondence should be addressed. E-mail: [guohuazhong@scau.edu.cn](mailto:guohuazhong@scau.edu.cn)

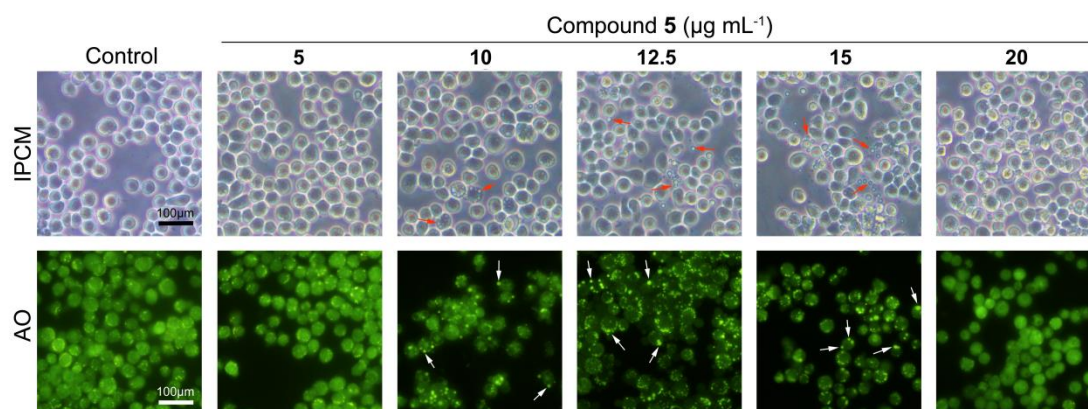

Figure S1. Representative photographs of cell morphological change induced by compound 5 at various concentrations for 24 h, respectively. IPCM: inverted phase contrast microscopy; AO: acridine orange. red and white arrow represented apoptosis bodies.

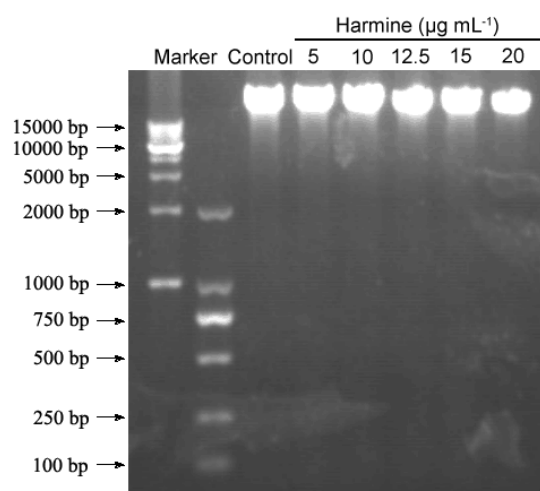

Figure S2. Agarose gel electrophoresis analysis of genomic DNA of cells treated by harmine at various concentrations.
